# Supplementary material
Source: Springer Nature journal article supplement (https://www.springermedizin.de/resource/supplementary/13019_2013_1427_MOESM3_ESM.pdf/9640642)
Supplement: MOESM3 [file 9640642]

| Model  | Study name | Statistics for each study |             |             |         |         | Odds ratio and 95% CI |      |      |       |        |
|--------|------------|---------------------------|-------------|-------------|---------|---------|-----------------------|------|------|-------|--------|
|        |            | Odds ratio                | Lower limit | Upper limit | Z-Value | p-Value | 0.01                  | 0.10 | 1.00 | 10.00 | 100.00 |
|        | suero      | 0.717                     | 0.558       | 0.922       | -2.599  | 0.009   |                       |      | +    |       |        |
|        | labriolle  | 0.687                     | 0.264       | 1.789       | -0.769  | 0.442   |                       |      | +    |       |        |
|        | hoye       | 0.821                     | 0.513       | 1.314       | -0.823  | 0.411   |                       |      | +    |       |        |
|        | olivari    | 0.636                     | 0.234       | 1.725       | -0.889  | 0.374   |                       |      | +    |       |        |
|        | aziz       | 0.544                     | 0.241       | 1.226       | -1.468  | 0.142   |                       |      | +    |       |        |
|        | valenti    | 0.396                     | 0.222       | 0.707       | -3.136  | 0.002   |                       |      | +    |       |        |
| Fixed  |            | 0.672                     | 0.555       | 0.815       | -4.046  | 0.000   |                       |      | +    |       |        |
| Random |            | 0.672                     | 0.555       | 0.815       | -4.046  | 0.000   |                       |      | +    |       |        |
